# Supplementary material
Source: publisher site journal article supplement (https://www.dovepress.com/article/571498)
Supplement: Supplementary file 1 [file 571498_checklist-Supplementary%20Table%20S1.docx]

**The RECORD statement – checklist of items, extended from the STROBE statement, that should be reported in observational studies using routinely collected health data.**

|  | **Item No.** | **STROBE items** | **Location in**  **manuscript where items are reported** | **RECORD items** | **Location in**  **manuscript**  **where items are reported** |
| --- | --- | --- | --- | --- | --- |
| **Title and abstract** | | | | | |
|  | 1 | (a) Indicate the study’s design with a commonly used term in the title or the abstract (b)  Provide in the abstract an  informative and balanced  summary of what was done and what was found | 1. Line19, this is a retropective study. 2. Line 16-35,we summarized the specific methods, results and conclusions of this research. | RECORD 1.1: The type of data used should be specified in the title or  abstract. When possible, the name of the databases used should be included.  RECORD 1.2: If applicable, the geographic region and timeframe within which the study took place should be reported in the title or abstract.  RECORD 1.3: If linkage between  databases was conducted for the study, this should be clearly stated in the title or abstract. | - 1. Line19, this is a retropective study,and this indicated the type of data we used is retrospective data.   2. Line19-20,we retrospectively analyzed 261 patients who received OLT between January 2020 and April 2024 in Beijing Friendship Hospital.   1.3 Not applicable. |
| **Introduction** | | | | | |
| Background rationale | 2 | Explain the scientific  background and rationale for the investigation being reported | Line36-70,we explain the scientific background  and rationale for the investigation being reported in detail. |  |  |
| Objectives | 3 | State specific objectives, including any prespecified hypotheses | Line16-18, we sate specific objectives and we indicated that the nomogram model was established by NLR and PTAR. |  |  |
| **Methods** | | | | | |
| Study Design | 4 | Present key elements of study design early in the paper | Line77-83,we provided the inclusion and exclusion criteria for the research, the type of the study, the research center, and the time range for data collection. |  |  |
| Setting | 5 | Describe the setting, locations, and relevant dates, including  periods of recruitment, exposure, follow-up, and data collection | Line73-83,we provided the specific study population,the inclusion and exclusion criteria for the research, the location of the study, th time range for data collection. |  |  |
| Participants | 6 | *(a) Cohort study* - Give the  eligibility criteria, and the  sources and methods of selection of participants. Describe  methods of follow-up  *Case-control study* - Give the  eligibility criteria, and the  sources and methods of case  ascertainment and control  selection. Give the rationale for the choice of cases and controls *Cross-sectional study* - Give the eligibility criteria, and the  sources and methods of selection of participants  *(b) Cohort study* - For matched studies, give matching criteria and number of exposed and  unexposed  *Case-control study* - For  matched studies, give matching criteria and the number of  controls per case | This study is a case-control study,line73-83,we provided the specific study population, the inclusion and exclusion criteria for the research, the location of the study, the time range for data collection,and the flowchart is shown in figure1.  Line 73-77, we gave the rationale for the choice of cases and controls(retropective study):it was driven by the research objective of identifying multiple risk factors associated with postoperative IAIs and exploring the relationship between preoperative NLR, PTAR, and the occurrence of postoperative IAIs. | RECORD 6.1: The methods of study  population selection (such as codes or algorithms used to identify subjects) should be listed in detail. If this is not possible, an explanation should be  provided.  RECORD 6.2: Any validation studies of the codes or algorithms used to  select the population should be  referenced. If validation was conducted for this study and not published  elsewhere, detailed methods and results should be provided.  RECORD 6.3: If the study involved  linkage of databases, consider use of a flow diagram or other graphical  display to demonstrate the data linkage process, including the number of  individuals with linked data at each stage. | 6.1 line73-83,we provided the inclusion and exclusion criteria for the research.  6.2 not applicable.  6.3 Not applicable. |
|  |  |  |

| Variables | 7 | Clearly define all outcomes,  exposures, predictors, potential confounders, and effect  modifiers. Give diagnostic criteria, if applicable. | Line73-83:we gave diagnostic criteria.  Line 192-287.we define all outcomes,  (with or without IAIs)exposures,predictors, potential confounders and effect modifiers. | RECORD 7.1: A complete list of codes and algorithms used to classify  exposures, outcomes, confounders, and effect modifiers should be provided. If these cannot be reported, an  explanation should be provided. | Line 192-287,the study design and data analysis methods informed the classification process for these variables; however, the corresponding code is not provided, as certain statistical methods require specialized software or tools that cannot be easily represented in generic form. |
| --- | --- | --- | --- | --- | --- |
| Data sources/  measurement | 8 | For each variable of interest, give sources of data and details of methods of assessment  (measurement).  Describe comparability of  assessment methods if there is more than one group | Line141-175 we gave sources of data and details of methods of assessment  (measurement). |  |  |
| Bias | 9 | Describe any efforts to address potential sources of bias | Figure1,line73-83:we explained the inclusion and exclusion criteria for the research in detail,and we expained the reason in the discussion part. |  |  |

| Study size | 10 | Explain how the study size was arrived at | Figure1:the final number of patients included after applying the inclusion and exclusion criteria corresponds to the number of studies analyzed. |  |  |
| --- | --- | --- | --- | --- | --- |
| Quantitative variables | 11 | Explain how quantitative  variables were handled in the analyses. If applicable, describe which groupings were chosen, and why | Line192-287:We provided a detailed description of the processing approach for each type of variable. |  |  |
| Statistical  methods | 12 | (a) Describe all statistical  methods, including those used to control for confounding  (b) Describe any methods used to examine subgroups and  interactions  (c) Explain how missing data were addressed  (d) *Cohort study* - If applicable, explain how loss to follow-up was addressed  *Case-control study* - If  applicable, explain how  matching of cases and controls was addressed  *Cross-sectional study* - If  applicable, describe analytical methods taking account of  sampling strategy  (e) Describe any sensitivity analyses | (a-b,e)Line141-175:We provided a detailed description of the statistical method.  (c)Figure1: we excluded patients with missing data. |  |  |
| Data access and cleaning methods |  | .. |  | RECORD 12.1: Authors should  describe the extent to which the  investigators had access to the database population used to create the study  population.  RECORD 12.2: Authors should  provide information on the data  cleaning methods used in the study. | 12.1 line 73-83,the final number of patients included after applying the inclusion and exclusion criteria corresponds to the number of studies analyzed,we had access to the database population to 100%.  Line 416-418:all patients' information has been anonymized. |
| Linkage |  | .. |  | RECORD 12.3: State whether the  study included person-level,  institutional-level, or other data linkage across two or more databases. The  methods of linkage and methods of linkage quality evaluation should be provided. | Line 142-146: there is no data linkage between 2 or more databases. |

| **Results** | | | | | |
| --- | --- | --- | --- | --- | --- |
| Participants | 13 | (a) Report the numbers of  individuals at each stage of the study (*e.g.*, numbers potentially eligible, examined for eligibility, confirmed eligible, included in the study, completing follow-up, and analysed)  (b) Give reasons for non- participation at each stage.  (c) Consider use of a flow diagram | (a-c)Figure1: the flowchart can be seen as figure1. | RECORD 13.1: Describe in detail the selection of the persons included in the study (*i.e.,* study population selection) including filtering based on data  quality, data availability and linkage. The selection of included persons can be described in the text and/or by  means of the study flow diagram. | Figure1: the flowchart can be seen as figure1. |
| Descriptive data | 14 | (a) Give characteristics of study participants (*e.g.*, demographic, clinical, social) and information on exposures and potential  confounders  (b) Indicate the number of  participants with missing data for each variable of interest  (c) *Cohort study* - summarise follow-up time (*e.g.*, average and total amount) | (a)Line192-287:Specific informetion can be checked in this part.  (b)Line192-287,the number of 261  participants with missing data for each variable of interest is 0  (c)Not applicable. |  |  |
| Outcome data | 15 | *Cohort study* - Report numbers of outcome events or summary measures over time  *Case-control study* - Report  numbers in each exposure  category, or summary measures of exposure  *Cross-sectional study* - Report numbers of outcome events or  summary measures | Line192-287:Specific informetion can be checked in this part. |  |  |

| Main results | 16 | (a) Give unadjusted estimates and, if applicable, confounder- adjusted estimates and their  precision (e.g., 95% confidence interval). Make clear which  confounders were adjusted for and why they were included  (b) Report category boundaries when continuous variables were categorized  (c) If relevant, consider  translating estimates of relative risk into absolute risk for a  meaningful time period | (a-c):Line192-287:Specific informetion can be checked in this part. |  |  |
| --- | --- | --- | --- | --- | --- |
| Other analyses | 17 | Report other analyses  done—e.g., analyses of  subgroups and interactions, and sensitivity analyses | Table7：we also did sensitivity analyses. |  |  |
| **Discussion** | | | | | |
| Key results | 18 | Summarise key results with reference to study objectives | Line192-287. |  |  |
| Limitations | 19 | Discuss limitations of the study, taking into account sources of potential bias or imprecision.  Discuss both direction and  magnitude of any potential bias | Line 397-403. | RECORD 19.1: Discuss the  implications of using data that were not created or collected to answer the  specific research question(s). Include discussion of misclassification bias, unmeasured confounding, missing  data, and changing eligibility over  time, as they pertain to the study being reported. | Line 397-403. |
| Interpretation | 20 | Give a cautious overall  interpretation of results  considering objectives,  limitations, multiplicity of analyses, results from similar studies, and other relevant  evidence | Line 397-403 |  |  |

| Generalisability | 21 | Discuss the generalisability (external validity) of the study results | Line 397-403. |  |  |
| --- | --- | --- | --- | --- | --- |
| **Other Information** | | | | | |
| Funding | 22 | Give the source of funding and the role of the funders for the present study and, if applicable, for the original study on which the present article is based | Line 437-438. |  |  |
| Accessibility of protocol, raw data, and  programming code |  | .. |  | RECORD 22.1: Authors should  provide information on how to access any supplemental information such as the study protocol, raw data, or  programming code. | Line 412-413. |

*Reference: Benchimol EI, Smeeth L, Guttmann A, Harron K, Moher D, Petersen I, Sørensen HT, von Elm E, Langan SM, the RECORD Working Committee. The REporting of studies Conducted using Observational Routinely-collected health Data (RECORD) Statement. *PLoS Med.* 2015 Oct 6;12(10):e1001885. doi: 10.1371/journal.pmed.1001885

*Checklist is protected under Creative Commons Attribution ([CC BY](http://creativecommons.org/licenses/by/4.0/)) license.
